# Supplementary material
Source: Elsevier journal article supplement (https://www.sciencedirect.com/science/article/pii/S1888989119300229)
Supplement: mmc1 [file S1888989119300229:mmc1.docx]

|  | **Sin abusos**  **(N=30)** | **Abuso físico o emocional**  **(N=23)** | **Abuso sexual**  **(N=9)** | ***P*** |
| --- | --- | --- | --- | --- |
| **Factores PANSS**  **(media±DE)** |  |  |  |  |
| **PANSS positivo** | 12,96±4,20 | 13,45±2,32 | 14,00±4,61 | 0,744 |
| **PANSS negativo** | 21,32±9,97 | 17,91±7,37 | 23,44±10,93 | 0,24 |
| **PANSS desorganización** | 8,63±2,89 | 8,09±2,98 | 9,00±3,91 | 0,709 |
| **PANSS excitación** | 5,57±3,12 | 5,74±2,83 | 6,11±3,98 | 0,904 |
| **PANSS ansiedad** | 4,00±2,51 | 4,00±2,11 | 4,00±1,73 | 1 |
| **PANSS preocupación** | 2,229±1,54 | 2,09±1,31 | 2,33±1,41 | 0,856 |
| **PANSS depresión** | 7,79±4,12 | 5,74±2,85 | 7,11±2,26 | 0,115 |
| **PANSS somatización** | 2,18±1,89 | 2,00±1,62 | 2,11±1,76 | 0,938 |
| **Diagnóstico (N/%)** |  |  |  | 0,284 |
| **Psicosis afectiva** | 7/25,93% | 2/8,70% | 2/22,22% |  |
| **Psicosis no afectiva** | 20/74,07% | 21/91,30% | 7/77,78% |  |

**Tabla 1 complementaria.** Diferencias en cuanto a datos clínicos en los grupos de abuso.

Pruebas ANOVA o χ2, según el caso.

**Tabla 2 complementaria.** Diferencias en cuanto a consumo de drogas entre los grupos de abuso.

|  | **Sin abusos**  **(N=30)** | **Abuso físico o emocional**  **(N=23)** | **Abuso sexual**  **(N=9)** | ***P*** |
| --- | --- | --- | --- | --- |
| **Fumadores diarios (N/%)** a | 24/85,71% | 20/100% | 8/88,89% | 0,422 |
| **Consumo de alcohol (N/%)** | 14/46,67% | 17/73,91% | 5/55,56% | 0,327 |
| **Consumo de cannabis (N/%)** | 15/50% | 17/73,91% | 4/44,44% | 0,145 |
| **Consumo de cocaína (N/%)** | 9/30% | 13/56,52% | 2/22,22% | 0,079 |
| **Consumo de estimulantes (N/%)** | 3/10% | 8/34,78% | 0 | 0,021* |
| **Consumo de alucinógenos (N/%)** | 0 | 2/8,70% | 0 | 0,173 |
| **Consumo de sedantes (N/%)** | 2/6,67% | 3/13,04% | 0 | 0,441 |
| **Consumo de opioides (N/%)** | 2/6,67% | 1/4,35% | 0 | 0,709 |
| **Consumo de otras drogas (N/%)** | 0 | 1/4,54% | 0 | 0,422 |

Consumo de drogas conforme a L-CIDI 1

Prueba χ2. *p<0,05

a N=57 (5 valores ausentes)

1. World Health Association. Composite International Diagnostic Interview (CIDI) version 1.1 1993.
